# Supplementary material for: Recyclable SERS-Based Immunoassay Guided by Photocatalytic Performance of Fe3O4@TiO2@Au Nanocomposites
Source: PubMed Central journal article supplement (PMC7146594; doi:10.3390/bios10030025), 2020-03-16
Supplement: biosensors-10-00025-s001.pdf [file biosensors-10-00025-s001.pdf]

## Supplementary data

### **Recyclable label-free SERS-based immunoassay of PSA in human serum mediated by enhanced photocatalysis arising from Ag nanoparticles and external magnetic field**

*Yuanyuan Du<sup>a</sup>, Hongmei Liu<sup>b</sup>, Ying Chen<sup>a</sup>, Yiran Tian<sup>a</sup>, Xiaoling Zhang<sup>c</sup>, Chenjie Gu<sup>a</sup>, Tao Jiang<sup>a,\*</sup>, Jun Zhou<sup>a</sup>*

<sup>a</sup>Department of Microelectronic Science and Engineering, School of Physical Science and Technology, Ningbo University, Ningbo 315211, Zhejiang, P. R. China

<sup>b</sup>Institute of Solid State Physics, Shanxi Datong University, Datong 037009, Shanxi, P. R. China

<sup>c</sup>Department of Neurology, Ningbo Medical Treatment Centre Lihuili Hospital, Ningbo 315000, Zhejiang, P. R. China

E-mail: [jiangtao@nbu.edu.cn](mailto:jiangtao@nbu.edu.cn) (T Jiang)

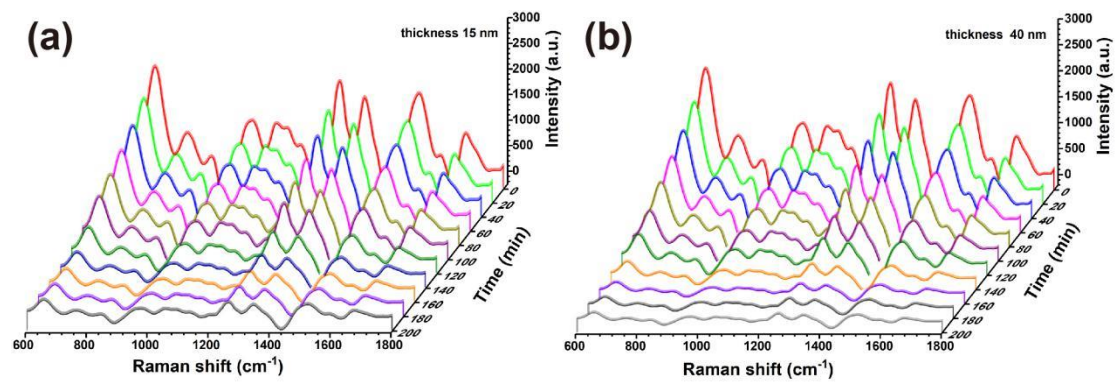

**Fig. S1.** SERS spectral change of PSA on Fe<sub>3</sub>O<sub>4</sub>@TiO<sub>2</sub>@Ag MPs with (a) 15 and (b) 40 nm TiO<sub>2</sub> shell during UV light irradiation.

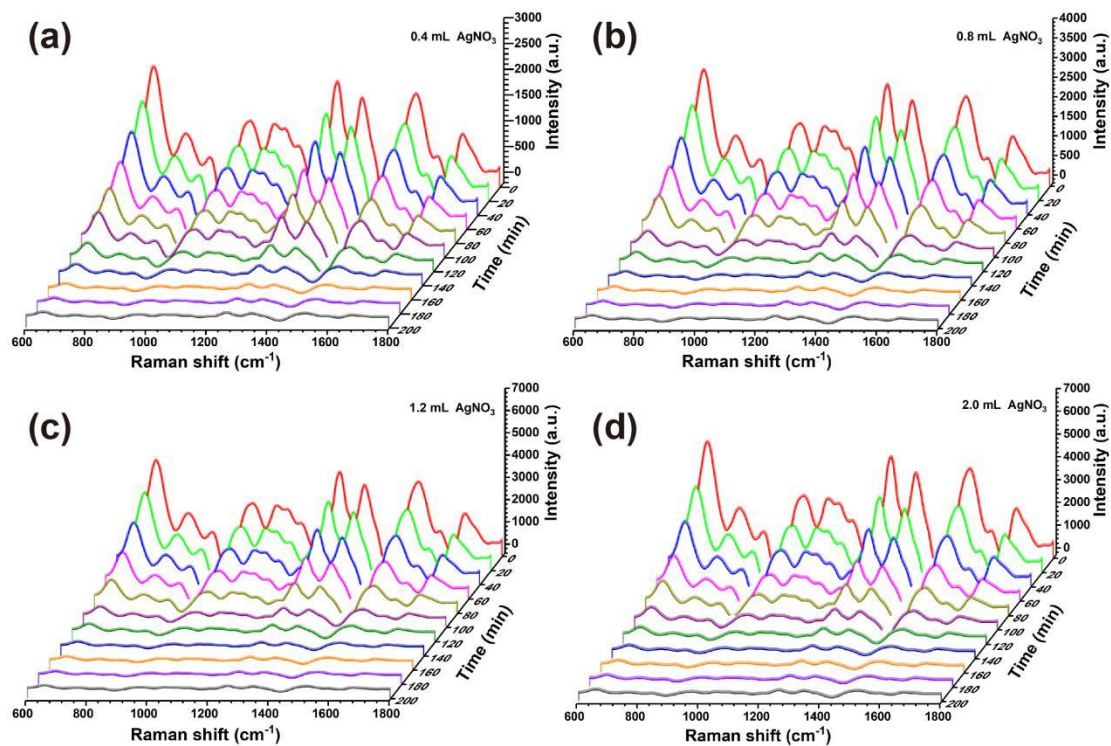

**Fig. S2.** SERS spectral change of PSA on  $\text{Fe}_3\text{O}_4@\text{TiO}_2@\text{Ag}$  MPs synthesized with (a) 0.4, (b) 0.8, (c) 1.2, and (d) 2.0 mL of  $\text{AgNO}_3$  during UV light irradiation without magnetic field.

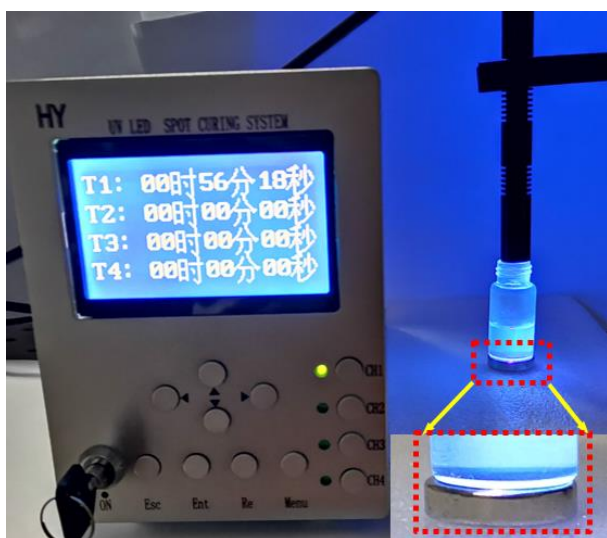

**Fig. S3.** A photograph of photocatalysis reaction.
